# Supplementary material for: Highly efficient synthesis of reduced graphene oxide–Nafion nanocomposites with strong coupling for enhanced proton and electron conduction
Source: Royal Society of Chemistry journal article supplement (doi:10.1039/c3ra44207a), 2013-01-01
Supplement: c3ra44207a.pdf [file c3ra44207a.pdf]

## Highly efficient synthesis of reduced graphene oxide/Nafion nanocomposites with strong coupling for enhanced proton and electron conduction

Belete Asefa Aragaw,<sup>a</sup> Wei-Nien Su<sup>b</sup> John Rick,<sup>a</sup> and Bing-Joe Hwang<sup>\*ac</sup>

### Affiliation:

<sup>a</sup>NanoElectrochemistry Laboratory, Department of Chemical Engineering, National Taiwan University of Science and Technology, Taipei 106, Taiwan. E-mail: [bjh@mail.ntust.edu.tw](mailto:bjh@mail.ntust.edu.tw)

<sup>b</sup>NanoElectrochemistry Laboratory, Graduate Institute of Applied Science and Technology, National Taiwan University of Science and Technology, Taipei 106, Taiwan

<sup>c</sup>National Synchrotron Radiation Research Center, Hsinchu 30076, Taiwan

### Supporting Information

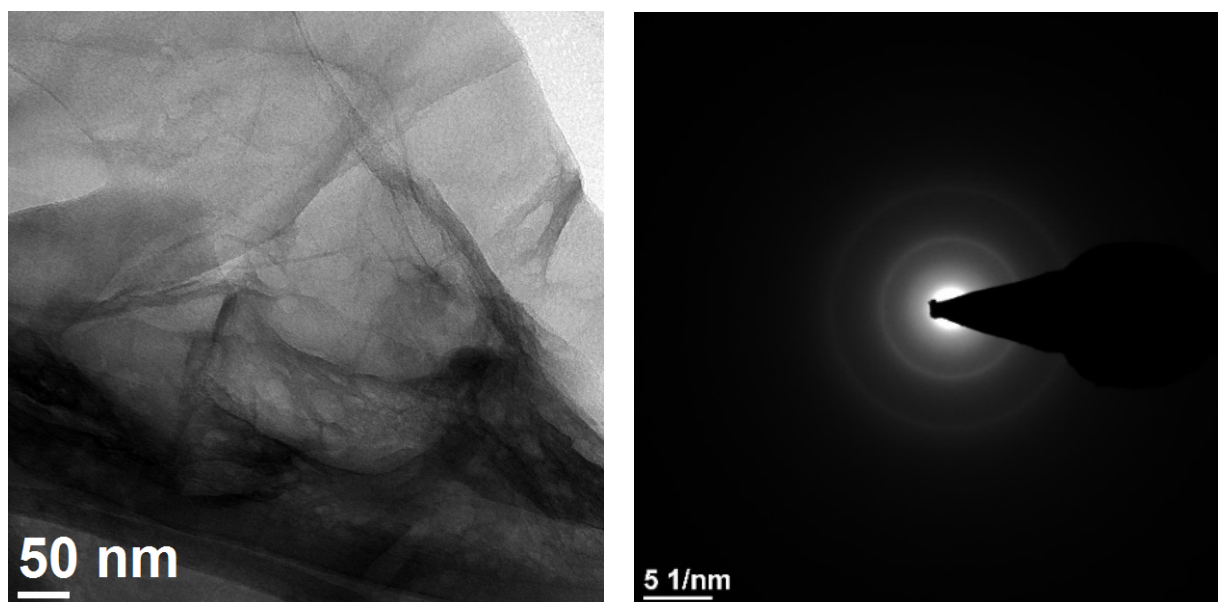

Figure S1: a) TEM b) SEAD images of graphene oxide.

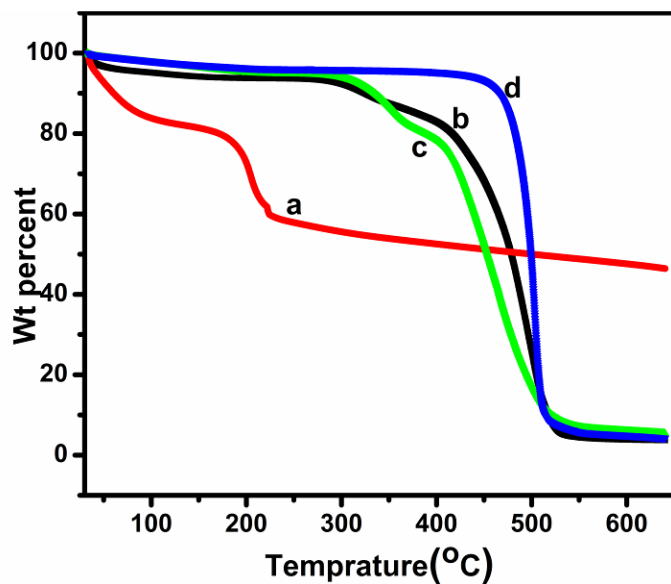

Figure S2. TGA curve for: a) GO, b)Nafion, c) GO-Nafion ( $H^+$  form), and d) GO-Nafion ( $Na^+$  form)

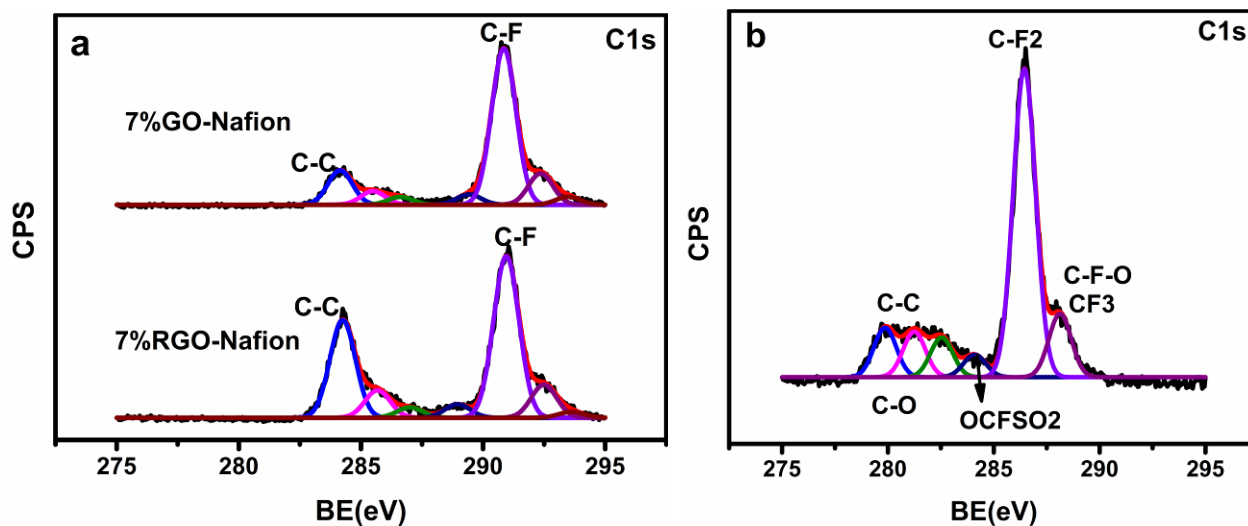

Figure S3. C 1s XPS spectra a) 7 wt. % GO- and RGO- Nafion b) recast Nafion

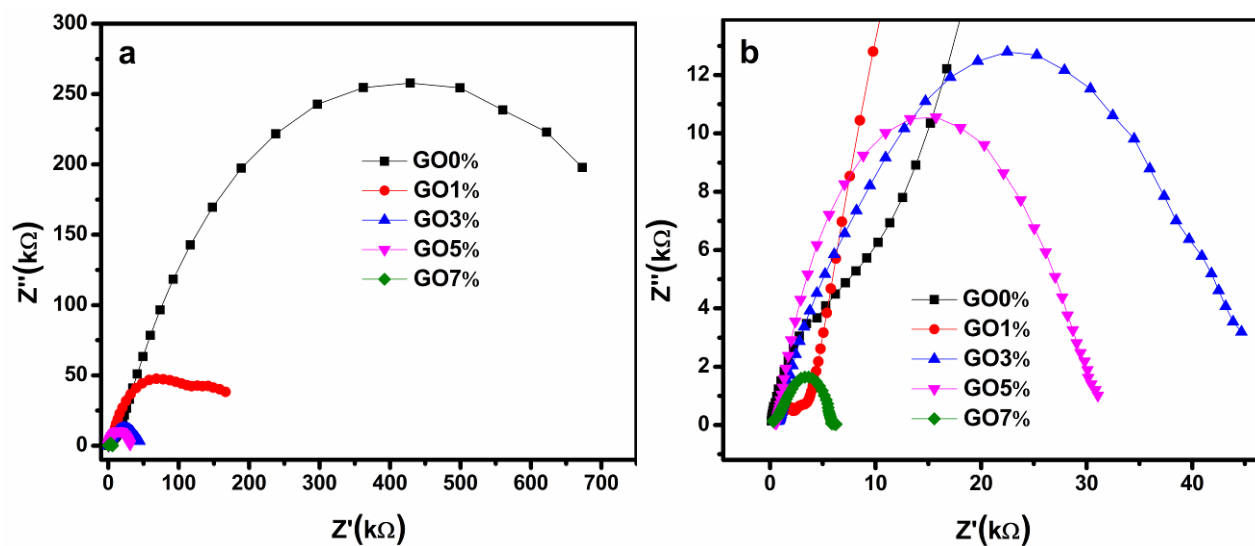

Figure S4. Nyquist plot of GO-Nafion composite for a) whole range and b) closer view

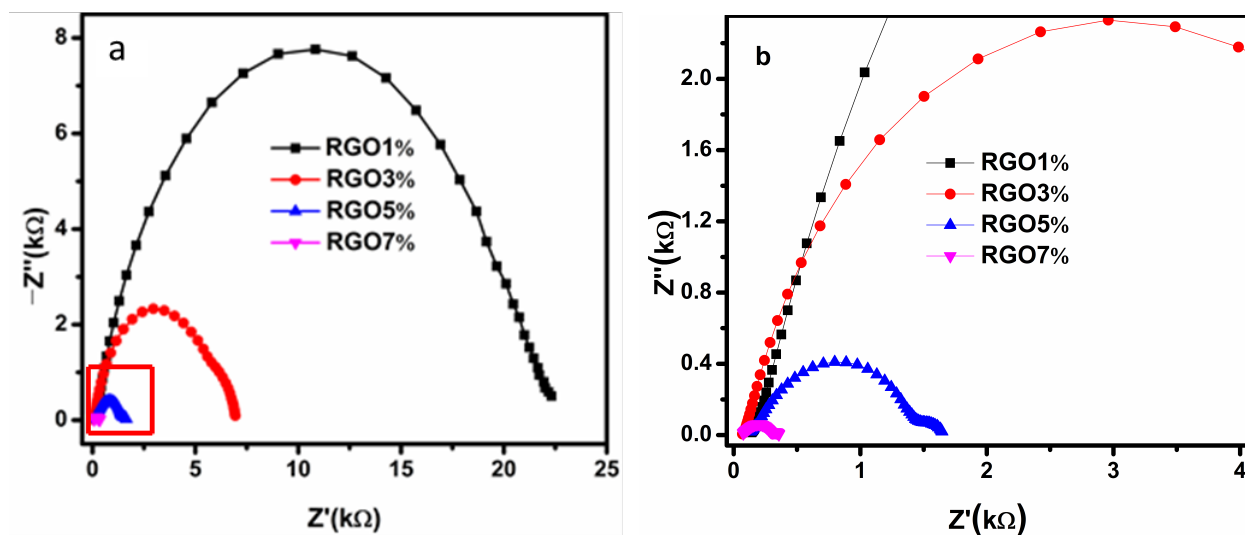

Figure S5. Nyquist plot at a) ambient condition for the different weight percent of RGO in Nafion. b) enlarged set of red box in (a)

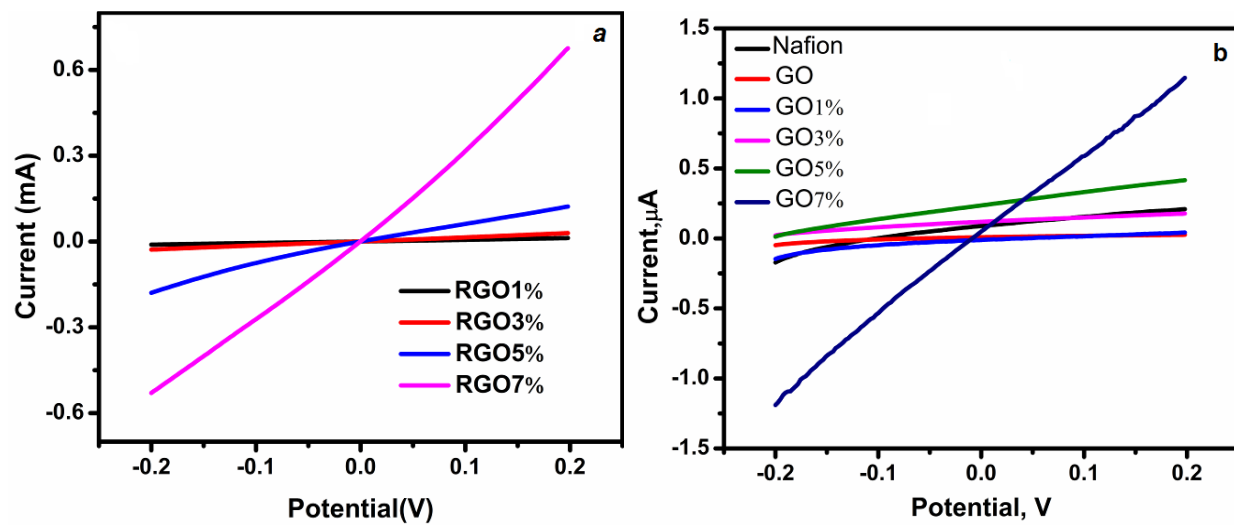

Figure S6. I-V plot a) RGO-and b) GO -Nafion composite stored at ambient condition
